# Supplementary material for: WWOX Controls Cell Survival, Immune Response and Disease Progression by pY33 to pS14 Transition to Alternate Signaling Partners
Source: MDPI journal article supplement (doi:10.3390/cells11142137), 2022-07-07
Supplement: s1 [file s1]

## **Supplemental Video Legends**

**Video S1.** Ceritinib induces individual breast 4T1 cell apoptosis and cell sphere explosion and death.

4T1 cells were pretreated with 10  $\mu$ l non-immune rabbit serum for 30 min, followed by treating with 30  $\mu$ M ceritinib for imaging the cell death event by time-lapse microscopy (15 min per frame). Note that the cells picked up DAPI first (without death; blue) and then PI (red) in dead cells. The stem cell sphere underwent explosion and then death. (Data from reference “Wang et al., 2019”)

**Video S2.** WWOX286-299 antiserum does not block ceritinib-induced death of breast 4T1 cells. Under

similar conditions, 4T1 cells were pretreated with 10  $\mu$ l WWOX antiserum against the WWOX286-299 peptide for 30 min, followed by treating with 30  $\mu$ M ceritinib for imaging of cell death by time-lapse microscopy (15 min per frame). (Data from reference “Wang et al., 2019”)

**Video S3.** WWOX7-21 antiserum blocked ceritinib-induced death of breast 4T1 cells. Under similar

conditions, 4T1 cells were pretreated with 10  $\mu$ l WWOX antiserum against WWOX7-21 peptide for 30 min, followed by treating with 30  $\mu$ M ceritinib for imaging of cell death by time-lapse microscopy (15 min per frame). (Data from reference “Wang et al., 2019”)
