# Supplementary material for: WWOX Controls Cell Survival, Immune Response and Disease Progression by pY33 to pS14 Transition to Alternate Signaling Partners
Source: Cells. 2022 Jul 7;11(14):2137. doi: 10.3390/cells11142137 (PMC9323965; doi:10.3390/cells11142137)
Supplement: Supplementary file 1 [file cells-11-02137-s001.zip]

Archive with 4 entries (4 files):
- Supplemental Video Legends.pdf
- Video S1 4t1_prebled serum_30min pre_ceritinib30uM.mp4
- Video S2.4t1_wwox286299Ab_pretreat30min_ceritinib30uM.mp4
- Video S3 4t1_wwox721Ab_pretreat30min_ceritinib30uM.mp4
